# Supplementary material
Source: PubMed Central journal article supplement (PMC2888403)

## SUPPLEMENTAL INFORMATION

**Fig. S1.** CARD8 is expressed in a variety of human tissues and different cell lines. (A) Expression of CARD8 mRNA in adult human tissues and different cell lines. cDNA samples from different human tissues were amplified by RT-PCR as described in Material and Methods. (B) Expression of endogenous CARD8 protein was detected in different cell lines using a polyclonal antibody against CARD8. As a control CARD8 was transiently overexpressed in HEK cells. Expression of  $\beta$ -actin served as loading control

**Fig. S2.** Subcellular distribution of NOD2 and CARD8. Measurement of relative color intensities of pAmCyan1-C1-CARD8 and pZsYellow1-C1-NOD2 along an indicated line.

**Fig. S3.** Expression verification of FLAG-NOD2, full length GFP-CARD8, GFP-CARD8(1-320). HEK cells have been transfected as indicated and were stimulated with MDP as described in Fig 2. After medium removal for detection of IL-1 $\beta$  and IL-8 release the cells have been subjected to Western Blot analysis (20  $\mu$ g protein lysate used for electrophoresis) to verify expression of the transfected protein with anti-FLAG-M2 antibody (Sigma-Aldrich, St. Louis, MO, USA), anti-GFP antibody (Clontech, Palo Alto, CA, USA). Expression of  $\beta$ -actin served as loading control.

Table S1. Oligonucleotides used for generation of MYC-tagged NOD2

| Expression construct | Sequence (5' to 3'): sense/antisense                                         | Vector                                      |
|----------------------|------------------------------------------------------------------------------|---------------------------------------------|
| MYC-NOD2             | CGAAGTCGACTATGGGGGAAGAGGGTGGTTCAG /<br>GAAAGCGGCCGCTCAAAGCAAGAGTCTGGTGTCCCTG | pCMV-MYC (BD Biosciences, San Jose, CA)     |
| YFP-NOD2             | GCTACTCGAGCTGGGGGAAGAGGGTGGTTC /<br>CGATGGATCCTCAAAGCAAGAGTCTGGTGTTC         | pZsYellow-C1 (Clontech, Palo Alto, CA, USA) |
| CFP-CARD8            | GCTACTCGAGCTATGAGACAGAGGCAGAGCC /<br>CGATGGATCCTTACAAATTCTGCTGTCTAAGATAGG    | pAmCyan-C1 (Clontech, Palo Alto, CA, USA)   |
| GFP-CARD8 (1-320)    | GCTAGCTAATGAGACAGAGGCAGAGCC /<br>CGATGGATCCTTAGAACCAAAGTTCAGGGGTTC           | pEGFP-C3 (Clontech, Palo Alto, CA, USA)     |

Table S2. Oligonucleotides used for RT-PCR

| Name          | Sequence (5' to 3')             | Amplicon length |
|---------------|---------------------------------|-----------------|
| RT.FL.CARD8.S | GAGACAGAGGCAGAGCCATTATTGTTCCG   | 1288 bp         |
| RT.FL.CARD8.A | CAAATTCTGCTGTCTAAGATAGGACACGAGG |                 |

Table S3. siRNA used for endogenous CARD8 knockdown  
(Invitrogen, Carlsbad, CA, USA)

| Name           | Sequence (5' to 3'): sense/antisense                     |
|----------------|----------------------------------------------------------|
| CARD8HSS117857 | CCCAUUCAACUUGAGAUUACUGAAA /<br>UUUCAGUAAUCUCAAGUUGAAUGGG |
| CARD8HSS117858 | CCCGAAGAUUAUUAAGUUCCACUUGU /<br>ACAAGUGGAACUUAUAUCUUCGGG |
| CARD8HSS177013 | GAGCCUUCUAUGCUGUCCUGGAAA /<br>UUUCCAGGACAGCAUAGAAAGGCUC  |

## Supporting Materials and Methods

### *Cell culture and Reagents*

Human embryonal kidney HEK293 cells, HeLaS3 cells, colonic carcinoma cell lines HT-29, SW480 and CACO-2, acute monocytic leukemia cell lines THP1 and Mono-Mac-6 were purchased from the German Collection of Microorganisms and Cell Cultures (DSMZ, Braunschweig, Germany). HEK293, CACO-2 and HT-29 were cultured in Dulbecco's MEM, all other cell lines were cultured in RPMI 1640 (media from PAA Laboratories, Paschberg, Austria). Media were supplemented with 10% fetal calf serum (FCS) and penicillin/streptomycin (each at 50µg/ml). Cell lines were grown in 5% CO<sub>2</sub> at 37°C. MDP was from Bachem.

### *mRNA isolation and RT-PCR*

Total RNA from respective cell lines were isolated using the RNeasy kit from Qiagen (Qiagen, Hilden, Germany) and subsequently reverse transcribed (Advantage RT-for-PCR kit, Clontech Laboratories, Palo Alto, CA). For investigation of tissue specific expression patterns, a human cDNA tissue panel have been used (Clontech, Palo Alto, CA, USA). See supplemental Table S2 for primer information. To confirm the use of equal RNA amounts all samples were checked for GAPDH mRNA expression. Amplified DNA fragments were analyzed on 1% agarose gels.

### *Gentamicin protection assay*

HEK cells were cultured for 1 h with fresh grown culture *Listeria monocytogenes* (serotype 1/2a, strain EGD) using 100 bacteria/cultured cell. Extracellular bacteria were eliminated with gentamicin (1 h, 100 µg/ml, Sigma) followed by washing (PBS buffer) and lysing (10% Triton X100). 5 µl lysate were mixed with 20 µl LB medium and grown on antibiotic-free agar plates (quadruplicates, 24 h, 37°C) and colony-forming units (CFU) were counted. The CFU number of an untreated sample was set as 100% used as a reference for all other samples.

### *Fluorescence microscopy*

HeLa expressing YFP-CARD8 and CFP-NOD2 were washed twice in ice-cold PBS, fixed (4% paraformaldehyde, Carl Roth, Karlsruhe, Germany), stained with DAPI (Roche, Mannheim, Germany) and subjected to microscopy (Axio Imager Z1 apotome-equipped, magnification 630-fold, Zeiss, Jena, Germany). Digital picture analysis was performed with ImageJ (<http://rsb.info.nih.gov/ij/>).

Supplemental Figure S1

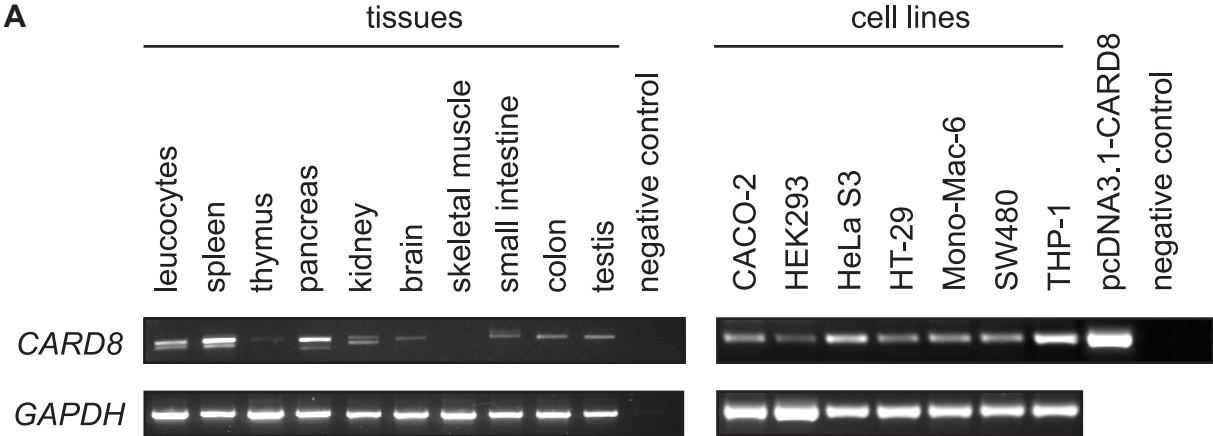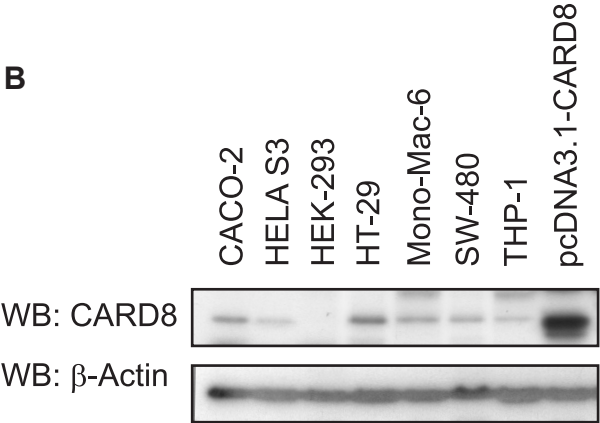

Supplemental Figure S2

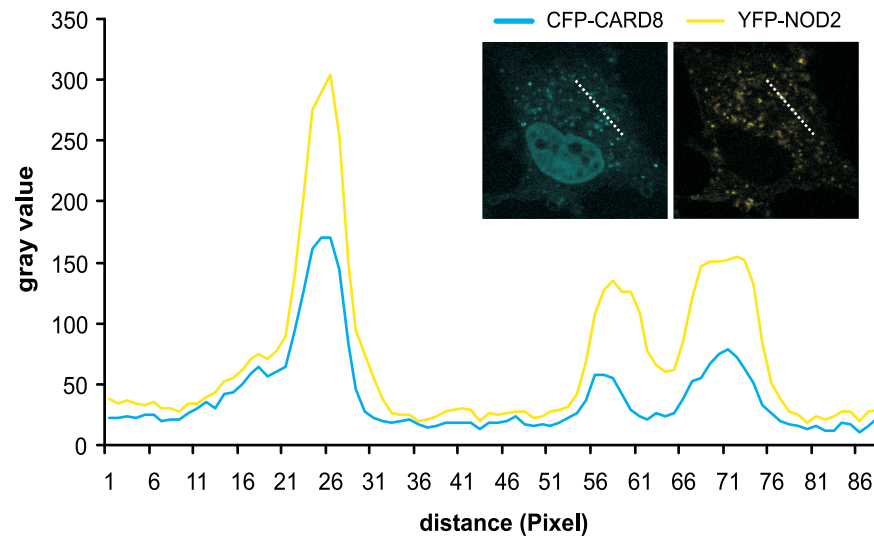

Supplemental Figure 3

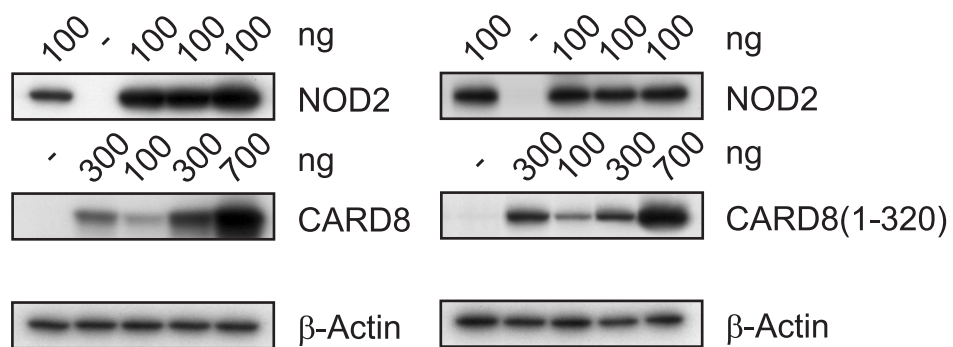

Supplement: supp_M110.127480_jbc.M110.127480-1.pdf [file supp_M110.127480_jbc.M110.127480-1.pdf]
